# Supplementary material for: New insights into lactylation in respiratory diseases: progress and perspectives
Source: PeerJ journal article supplement (doi:10.7717/peerj.20548), 2026-01-09

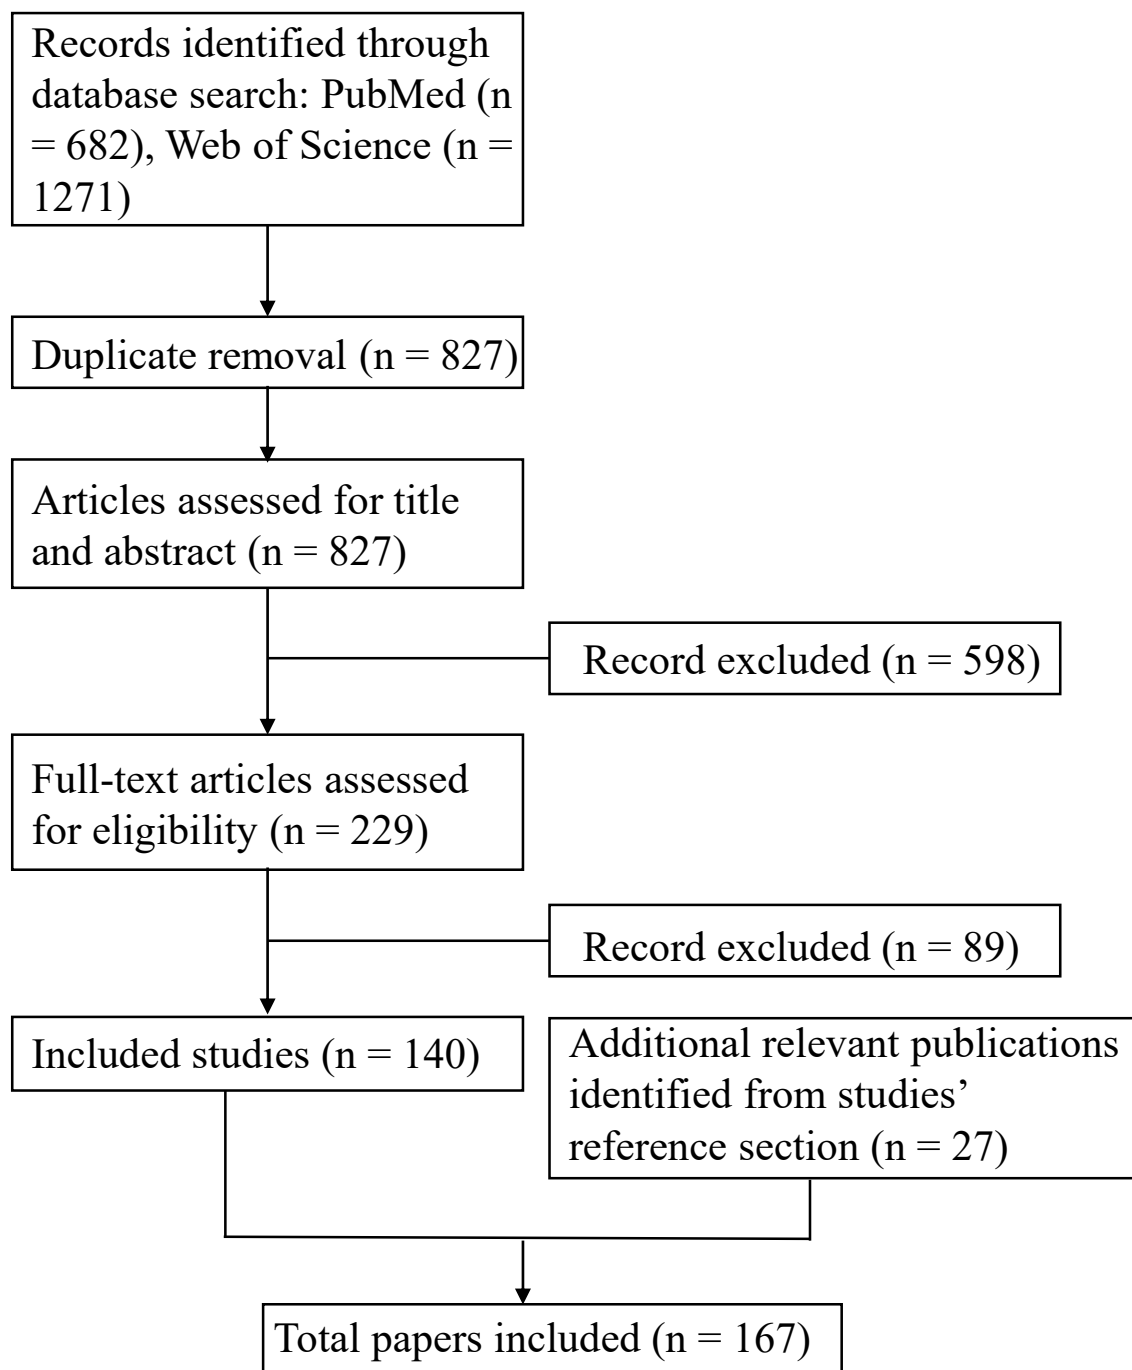

Supplement: Supplementary_Figure_1.pdf [file Supplementary_Figure_1.pdf]
